# Supplementary material for: The hydration of an oxy-polycyclic aromatic compound: the case of naphthaldehyde
Source: Royal Society of Chemistry journal article supplement (doi:10.1039/d3cp02649c), 2023-01-01

## Supplementary Information

Jordan A. Claus<sup>1</sup>, Celina Bermúdez<sup>1,2</sup>, Valérie Vallet<sup>1</sup>, Laurent Margulès<sup>1</sup>, and Manuel Goubet<sup>1</sup>

<sup>1</sup>Univ. Lille, CNRS, UMR 8523 - PhLAM - Physique des Lasers Atomes et Molécules, F-59000 Lille, France

<sup>2</sup>Departamento de Química Física y Química Inorgánica, Facultad de Ciencias - I.U. CINQUIMA, Universidad de Valladolid, Valladolid 47011, Spain

Email ids: <sup>1</sup>jordan.claus@univ-lille.fr; valerie.vallet@univ-lille.fr; laurent.margules@univ-lille.fr; manuel.goubet@univ-lille.fr, <sup>2</sup>celina.bermudez@uva.es

### Abstract

|    |                                                                                                                                                                                                              |    |
|----|--------------------------------------------------------------------------------------------------------------------------------------------------------------------------------------------------------------|----|
| 1  | Full set of calculated relative energies (in kJ/mol), rotational constants (in MHz) and dipole moment components (in D). . . . .                                                                             | 3  |
| 2  | Cartesian coordinates for the optimized geometry for the $\alpha$ -naphthaldehyde water complex ( <i>cis</i> - $\alpha$ -I) observed at the MP2/aug-cc-pVTZ level of theory . . . . .                        | 4  |
| 3  | Cartesian coordinates for the optimized geometry for the $\alpha$ -naphthaldehyde water complex ( <i>cis</i> - $\alpha$ -I) observed at the B98/aug-cc-pVQZ level of theory . . . . .                        | 5  |
| 4  | Cartesian coordinates for the optimized geometry for the $\beta$ -naphthaldehyde water complex ( <i>trans</i> - $\beta$ -I) observed at the MP2/aug-cc-pVTZ level of theory . . . . .                        | 6  |
| 5  | Cartesian coordinates for the optimized geometry for the $\beta$ -naphthaldehyde water complex ( <i>trans</i> - $\beta$ -I) observed at the B98/aug-cc-pVQZ level of theory . . . . .                        | 7  |
| 6  | Cartesian coordinates for the optimized geometry for the $\beta$ -naphthaldehyde water complex ( <i>trans</i> - $\beta$ -II) observed at the MP2/aug-cc-pVTZ level of theory . . . . .                       | 8  |
| 7  | Cartesian coordinates for the optimized geometry for the $\beta$ -naphthaldehyde water complex ( <i>trans</i> - $\beta$ -II) observed at the B98/aug-cc-pVQZ level of theory . . . . .                       | 9  |
| 8  | List of assigned rotational transitions for the most stable conformer of $\alpha$ -naphthaldehyde ( <i>cis</i> - $\alpha$ -I) and their simulations out of the best fit using SPFIT program . . . . .        | 10 |
| 9  | List of assigned rotational transitions for the second most stable conformer of $\beta$ -naphthaldehyde ( <i>trans</i> - $\beta$ -I) and their simulations out of the best fit using SPFIT program . . . . . | 13 |
| 10 | List of assigned rotational transitions for the most stable conformer of $\beta$ -naphthaldehyde ( <i>trans</i> - $\beta$ -II) and their simulations out of the best fit using SPFIT program . . . . .       | 14 |
| 11 | Calculated natural charges of <i>cis</i> - $\alpha$ -naphthaldehyde and its hydrate <i>cis</i> - $\alpha$ -I, and the electronic charge variation . . . . .                                                  | 16 |
| 12 | Calculated natural charges of <i>trans</i> - $\beta$ -naphthaldehyde and its hydrate <i>trans</i> - $\beta$ -I, and the electronic charge variation . . . . .                                                | 17 |
| 13 | Calculated natural charges of <i>trans</i> - $\beta$ -naphthaldehyde and its hydrate <i>trans</i> - $\beta$ -II, and the electronic charge variation . . . . .                                               | 18 |
| 14 | Structures, relative energies, rotational constants and dipole moment components of the most stables dihydrates for $\alpha$ -naphthaldehyde at MP2/aug-cc-pVTZ level of theory. . . . .                     | 19 |
| 15 | Structures, relative energies, rotational constants and dipole moment components of the most stables dihydrates for $\beta$ -naphthaldehyde at MP2/aug-cc-pVTZ level of theory. . . . .                      | 19 |

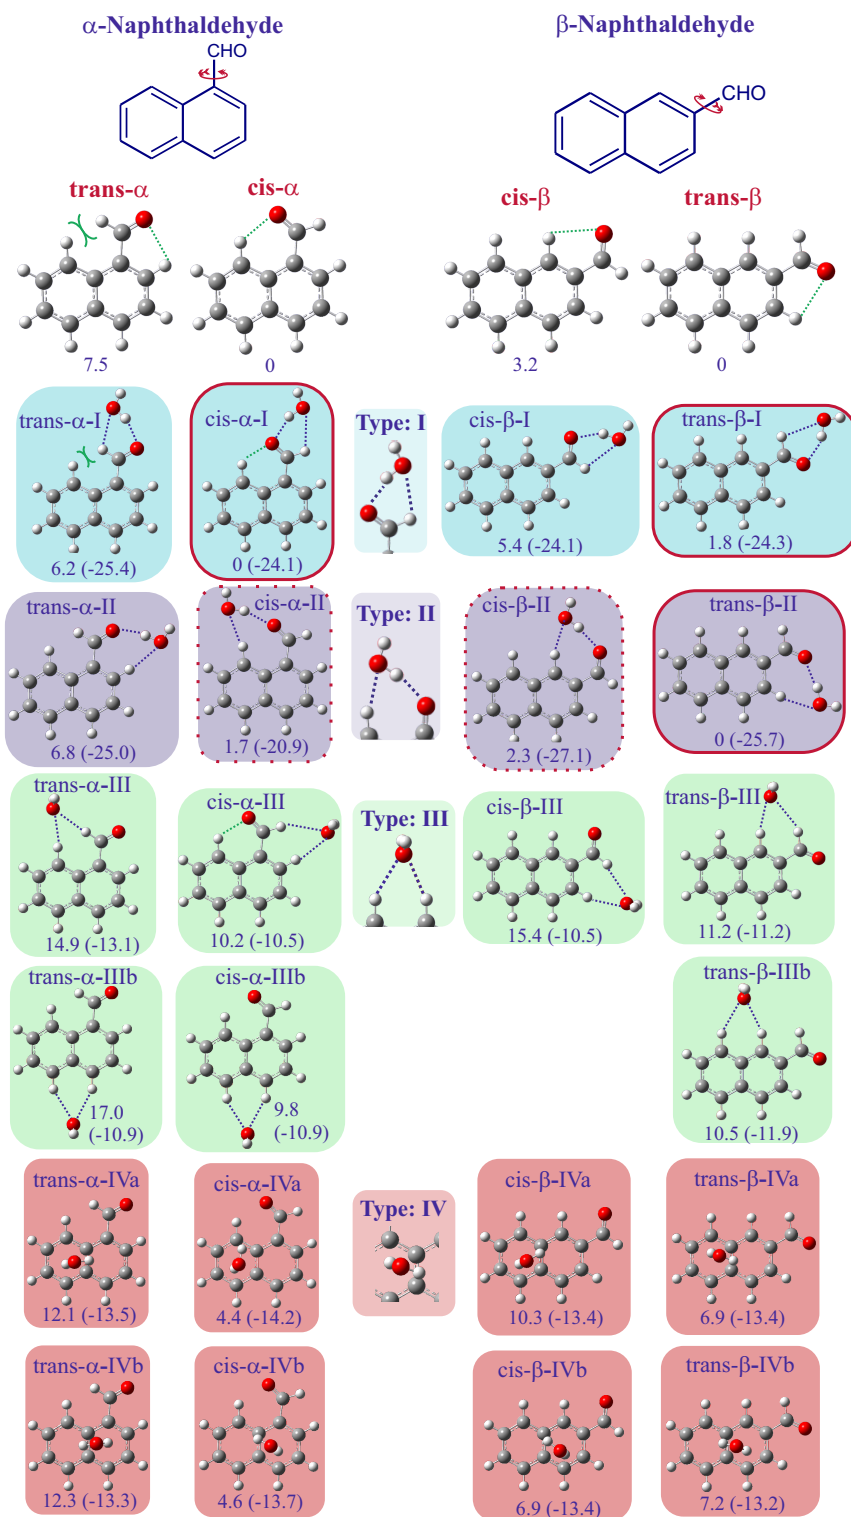

Figure 1: Enlarged version of figure 1.

Table 1: Full set of calculated relative energies (in kJ/mol), rotational constants (in MHz) and dipole moment components (in D).

| species                | c- $\alpha$ -I | c- $\alpha$ -II | c- $\alpha$ -III | c- $\alpha$ -IIIb | c- $\alpha$ -IVa | c- $\alpha$ -IVb | t- $\alpha$ -I | t- $\alpha$ -II | t- $\alpha$ -III | t- $\alpha$ -IIIb | t- $\alpha$ -IVa | t- $\alpha$ -IVb |
|------------------------|----------------|-----------------|------------------|-------------------|------------------|------------------|----------------|-----------------|------------------|-------------------|------------------|------------------|
| MP2/aug-cc-pVTZ        |                |                 |                  |                   |                  |                  |                |                 |                  |                   |                  |                  |
| $\Delta E_{ZPE}$       | 0.00           | 1.74            | 10.18            | 9.80              | 4.38             | 4.64             | 6.23           | 6.85            | 14.90            | 16.97             | 12.09            | 12.31            |
| A                      | 1317.5         | 1024.2          | 1343.5           | 1187.2            | 980.2            | 942.2            | 1211.6         | 1618.4          | 890.4            | 1159.0            | 1114.2           | 1089.1           |
| B                      | 501.9          | 678.8           | 512.6            | 556.9             | 721.7            | 771.2            | 521.3          | 481.3           | 706.9            | 537.0             | 630.3            | 654.9            |
| C                      | 363.4          | 408.6           | 371.7            | 379.8             | 549.6            | 568.9            | 364.5          | 372.0           | 394.8            | 367.6             | 532.2            | 546.6            |
| $\mu_a$                | 3.2            | 3.0             | 2.1              | 5.5               | 0.1              | 1.6              | -2.9           | -3.2            | 4.2              | 5.7               | 2.3              | 3.4              |
| $\mu_b$                | -0.7           | -1.4            | 2.6              | -1.8              | 2.4              | 1.7              | 0.6            | -0.4            | -0.9             | 0.0               | 1.1              | -0.2             |
| $\mu_c$                | 0.0            | -0.5            | 0.0              | 0.0               | -1.9             | 2.5              | 0.0            | -0.5            | -0.7             | 0.0               | -2.5             | -2.4             |
| B98/aug-cc-pVTZ        |                |                 |                  |                   |                  |                  |                |                 |                  |                   |                  |                  |
| $\Delta E_{ZPE}$       | 0.0            | 1.40            | 8.53             | 7.72              |                  |                  | 4.80           | 5.38            | 14.49            | 15.34             |                  |                  |
| A                      | 1296.0         | 1026.0          | 1339.6           | 1179.0            |                  |                  | 1248.1         | 1630.3          | 887.0            | 1141.4            |                  |                  |
| B                      | 489.7          | 650.7           | 498.5            | 541.8             |                  |                  | 490.3          | 471.7           | 684.4            | 525.7             |                  |                  |
| C                      | 355.4          | 398.6           | 363.9            | 371.8             |                  |                  | 352.0          | 366.1           | 387.0            | 360.5             |                  |                  |
| $\mu_a$                | -4.2           | -3.7            | 1.8              | 5.8               |                  |                  | -3.9           | -3.8            | -0.6             | 6.0               |                  |                  |
| $\mu_b$                | -0.8           | -1.3            | 2.7              | -1.7              |                  |                  | 1.0            | -0.1            | 2.2              | -0.1              |                  |                  |
| $\mu_c$                | 0.0            | 0.9             | 0.0              | 0.0               |                  |                  | 0.0            | -0.7            | 0.0              | 0.0               |                  |                  |
| B3LYP/6-311g++(d,p)    |                |                 |                  |                   |                  |                  |                |                 |                  |                   |                  |                  |
| $\Delta E_{ZPE}$       | 0.0            | 3.29            | 10.84            | 10.94             |                  |                  | 6.48           | 6.88            | 16.79            | 18.12             |                  |                  |
| A                      | 1285.1         | 1024.1          | 1337.2           | 1180.0            |                  |                  | 1251.4         | 1626.5          | 887.1            | 1148.6            |                  |                  |
| B                      | 489.4          | 656.1           | 508.6            | 552.7             |                  |                  | 487.1          | 474.6           | 699.4            | 534.0             |                  |                  |
| C                      | 354.4          | 400.2           | 369.1            | 377.1             |                  |                  | 350.6          | 367.5           | 391.8            | 365.1             |                  |                  |
| $\mu_a$                | -4.4           | -3.7            | 2.2              | 6.1               |                  |                  | -3.9           | -3.7            | -0.4             | 6.4               |                  |                  |
| $\mu_b$                | -0.6           | -1.5            | 3.0              | -1.9              |                  |                  | 1.2            | -0.2            | 2.7              | 0.0               |                  |                  |
| $\mu_c$                | 0.0            | 0.9             | 0.0              | 0.0               |                  |                  | 0.0            | -0.7            | 0.0              | 0.0               |                  |                  |
| B3LYP-D3/6-311g++(d,p) |                |                 |                  |                   |                  |                  |                |                 |                  |                   |                  |                  |
| $\Delta E_{ZPE}$       | 0.0            | 2.24            |                  |                   |                  |                  |                |                 |                  |                   |                  |                  |
| A                      | 1301.4         | 1021.2          |                  |                   |                  |                  |                |                 |                  |                   |                  |                  |
| B                      | 497.2          | 677.9           |                  |                   |                  |                  |                |                 |                  |                   |                  |                  |
| C                      | 359.8          | 407.8           |                  |                   |                  |                  |                |                 |                  |                   |                  |                  |
| $\mu_a$                | 4.0            | 3.6             |                  |                   |                  |                  |                |                 |                  |                   |                  |                  |
| $\mu_b$                | -0.7           | -2.3            |                  |                   |                  |                  |                |                 |                  |                   |                  |                  |
| $\mu_c$                | 0.0            | -0.9            |                  |                   |                  |                  |                |                 |                  |                   |                  |                  |
| species                | t- $\beta$ -I  | t- $\beta$ -II  | t- $\beta$ -III  | t- $\beta$ -IIIb  | t- $\beta$ -IVa  | t- $\beta$ -IVb  | c- $\beta$ -I  | c- $\beta$ -II  | c- $\beta$ -III  | c- $\beta$ -IVa   | c- $\beta$ -IVb  |                  |
| MP2/aug-cc-pVTZ        |                |                 |                  |                   |                  |                  |                |                 |                  |                   |                  |                  |
| $\Delta E_{ZPE}$       | 1.78           | 0.00            | 11.20            | 10.52             | 6.91             | 7.15             | 5.37           | 2.28            | 15.40            | 10.33             | 10.66            |                  |
| A                      | 2250.2         | 1946.1          | 1126.0           | 981.5             | 1511.2           | 1488.9           | 2383.6         | 1310.1          | 1492.6           | 1386.5            | 1316.5           |                  |
| B                      | 349.3          | 408.9           | 523.6            | 582.1             | 476.0            | 495.2            | 348.1          | 525.2           | 429.2            | 498.7             | 530.4            |                  |
| C                      | 302.4          | 337.9           | 358.0            | 366.0             | 461.6            | 478.3            | 303.8          | 374.9           | 333.9            | 471.4             | 483.2            |                  |
| $\mu_a$                | -3.7           | 3.1             | 1.6              | 3.2               | -2.7             | -3.9             | -3.6           | -2.0            | -0.6             | -1.6              | -3.3             |                  |
| $\mu_b$                | -0.4           | -1.4            | 3.8              | 3.5               | -0.5             | 1.7              | -0.3           | -1.8            | 3.7              | -1.7              | 0.1              |                  |
| $\mu_c$                | 0.0            | 0.0             | 0.0              | 0.0               | -2.5             | -1.7             | 0.0            | 0.0             | 0.0              | -2.4              | -2.3             |                  |
| B98/aug-cc-pVTZ        |                |                 |                  |                   |                  |                  |                |                 |                  |                   |                  |                  |
| $\Delta E_{ZPE}$       | 0.21           | 0.0             |                  | 9.80              |                  |                  | 3.57           | 1.81            | 14.09            |                   |                  |                  |
| A                      | 2369.6         | 1950.9          |                  | 944.7             |                  |                  | 2364.6         | 1301.9          | 1459.3           |                   |                  |                  |
| B                      | 334.7          | 402.3           |                  | 580.0             |                  |                  | 338.9          | 517.1           | 422.2            |                   |                  |                  |
| C                      | 293.3          | 333.6           |                  | 360.0             |                  |                  | 296.4          | 370.2           | 328.0            |                   |                  |                  |
| $\mu_a$                | -4.6           | -3.8            |                  | 3.3               |                  |                  | -4.6           | -2.5            | -0.3             |                   |                  |                  |
| $\mu_b$                | -0.5           | -1.4            |                  | -3.5              |                  |                  | -0.2           | -1.9            | 3.6              |                   |                  |                  |
| $\mu_c$                | 0.0            | -0.7            |                  | 0.0               |                  |                  | 0.0            | -0.5            | 0.0              |                   |                  |                  |
| B3LYP/6-311g++(d,p)    |                |                 |                  |                   |                  |                  |                |                 |                  |                   |                  |                  |
| $\Delta E_{ZPE}$       | 0.51           | 0.0             |                  | 11.94             |                  |                  | 3.71           | 1.42            | 14.78            |                   |                  |                  |
| A                      | 2416.0         | 1945.7          |                  | 970.7             |                  |                  | 2341.8         | 1305.9          | 1478.7           |                   |                  |                  |
| B                      | 330.3          | 404.4           |                  | 579.4             |                  |                  | 336.8          | 519.5           | 427.3            |                   |                  |                  |
| C                      | 290.6          | 334.9           |                  | 363.4             |                  |                  | 294.5          | 371.7           | 332.0            |                   |                  |                  |
| $\mu_a$                | -4.9           | -3.7            |                  | -3.5              |                  |                  | -4.9           | -2.5            | -0.4             |                   |                  |                  |
| $\mu_b$                | -0.7           | -1.4            |                  | 3.7               |                  |                  | -0.1           | -1.9            | 4.0              |                   |                  |                  |
| $\mu_c$                | 0.0            | -0.7            |                  | 0.0               |                  |                  | 0.0            | -0.7            | 0.0              |                   |                  |                  |

c and t stand for *cis* and *trans*, respectively. Group IV structures have been calculated at the MP2 level only. The *trans*- $\beta$ -III structure is not converging using DFT methods. Tests calculations including London dispersion were only performed on the two lowest energy conformers of the  $\alpha$ -naphthaldehyde monohydrate.

Table 2: Cartesian coordinates for the optimized geometry for the  $\alpha$ -naphthaldehyde water complex (*cis*- $\alpha$ -I) observed at the MP2/aug-cc-pVTZ level of theory

| Number          | Atom | x          | y          | z          |
|-----------------|------|------------|------------|------------|
| $\alpha$ -cis-I |      |            |            |            |
| 1               | C    | -0.627 172 | -0.632 555 | 0.000 003  |
| 2               | C    | -0.530 245 | -2.016 898 | 0.000 006  |
| 3               | C    | 0.715 585  | -2.664 579 | -0.000 001 |
| 4               | C    | 1.869 514  | -1.913 161 | -0.000 006 |
| 5               | C    | 3.011 728  | 0.262 375  | -0.000 001 |
| 6               | C    | 2.964 172  | 1.638 726  | 0.000 005  |
| 7               | C    | 1.720 732  | 2.299 458  | 0.000 011  |
| 8               | C    | 0.537 959  | 1.587 542  | 0.000 007  |
| 9               | C    | 0.553 103  | 0.172 303  | 0.000 000  |
| 10              | C    | 1.819 637  | -0.498 427 | -0.000 003 |
| 11              | H    | -0.410 635 | 2.101 677  | 0.000 009  |
| 12              | H    | 1.689 179  | 3.381 509  | 0.000 018  |
| 13              | H    | 3.881 631  | 2.213 041  | 0.000 008  |
| 14              | H    | 3.962 564  | -0.257 664 | -0.000 004 |
| 15              | H    | 2.839 451  | -2.397 766 | -0.000 011 |
| 16              | H    | 0.765 762  | -3.745 321 | -0.000 002 |
| 17              | H    | -1.443 701 | -2.601 566 | 0.000 012  |
| 18              | H    | -2.774 856 | -0.902 879 | 0.000 036  |
| 19              | O    | -2.346 626 | 1.063 605  | -0.000 039 |
| 20              | C    | -2.002 892 | -0.113 416 | 0.000 001  |
| 21              | H    | -4.253 256 | 0.867 913  | -0.000 013 |
| 22              | O    | -5.084 197 | 0.365 227  | 0.000 025  |
| 23              | H    | -5.774 338 | 1.032 993  | -0.000 090 |

Table 3: Cartesian coordinates for the optimized geometry for the  $\alpha$ -naphthaldehyde water complex (*cis*- $\alpha$ -I) observed at the B98/aug-cc-pVQZ level of theory

| Number          | Atom | x          | y          | z          |
|-----------------|------|------------|------------|------------|
| $\alpha$ -cis-I |      |            |            |            |
| 1               | C    | -0.578 747 | -0.712 461 | 0.008 885  |
| 2               | C    | -0.392 716 | -2.084 200 | 0.006 300  |
| 3               | C    | 0.890 226  | -2.657 222 | -0.000 788 |
| 4               | C    | 1.991 519  | -1.839 571 | -0.005 423 |
| 5               | C    | 3.007 220  | 0.405 208  | -0.009 187 |
| 6               | C    | 2.881 242  | 1.770 881  | -0.008 229 |
| 7               | C    | 1.599 119  | 2.356 335  | -0.001 845 |
| 8               | C    | 0.464 193  | 1.579 478  | 0.003 886  |
| 9               | C    | 0.558 390  | 0.165 537  | 0.003 402  |
| 10              | C    | 1.860 936  | -0.427 288 | -0.003 642 |
| 11              | H    | -0.511 828 | 2.038 299  | 0.008 296  |
| 12              | H    | 1.505 640  | 3.435 162  | -0.001 757 |
| 13              | H    | 3.762 033  | 2.400 325  | -0.012 691 |
| 14              | H    | 3.986 713  | -0.058 142 | -0.014 479 |
| 15              | H    | 2.988 122  | -2.265 826 | -0.010 879 |
| 16              | H    | 1.002 561  | -3.733 336 | -0.002 633 |
| 17              | H    | -1.264 765 | -2.728 460 | 0.009 823  |
| 18              | H    | -2.705 427 | -1.116 783 | 0.018 908  |
| 19              | O    | -2.402 839 | 0.865 679  | 0.024 205  |
| 20              | C    | -1.985 734 | -0.275 591 | 0.017 761  |
| 21              | H    | -4.331 223 | 0.776 417  | -0.016 066 |
| 22              | O    | -5.236 528 | 0.433 292  | -0.054 156 |
| 23              | H    | -5.778 038 | 1.103 328  | 0.364 420  |

Table 4: Cartesian coordinates for the optimized geometry for the  $\beta$ -naphthaldehyde water complex (*trans*- $\beta$ -I) observed at the MP2/aug-cc-pVTZ level of theory

| Number           | Atom | x          | y          | z          |
|------------------|------|------------|------------|------------|
| $\beta$ -trans-I |      |            |            |            |
| 1                | C    | 0.199 729  | 0.833 163  | 0.000 046  |
| 2                | C    | 1.082 577  | -0.230 091 | 0.000 039  |
| 3                | C    | 0.609 044  | -1.563 602 | 0.000 002  |
| 4                | C    | -0.742 964 | -1.804 608 | -0.000 027 |
| 5                | C    | -3.070 525 | -0.961 984 | -0.000 048 |
| 6                | C    | -3.955 005 | 0.095 922  | -0.000 038 |
| 7                | C    | -3.478 742 | 1.423 823  | 0.000 000  |
| 8                | C    | -2.124 588 | 1.678 364  | 0.000 027  |
| 9                | C    | -1.195 025 | 0.611 974  | 0.000 019  |
| 10               | C    | -1.675 908 | -0.735 681 | -0.000 019 |
| 11               | H    | -1.755 175 | 2.697 252  | 0.000 056  |
| 12               | H    | -4.182 789 | 2.245 836  | 0.000 008  |
| 13               | H    | -5.021 007 | -0.091 489 | -0.000 059 |
| 14               | H    | -3.436 401 | -1.982 206 | -0.000 077 |
| 15               | H    | -1.117 747 | -2.821 806 | -0.000 057 |
| 16               | H    | 1.329 267  | -2.371 450 | -0.000 004 |
| 17               | H    | 0.580 607  | 1.850 264  | 0.000 074  |
| 18               | H    | 2.800 163  | 1.123 054  | 0.000 096  |
| 19               | O    | 3.394 637  | -0.806 288 | 0.000 067  |
| 20               | C    | 2.523 628  | 0.054 901  | 0.000 069  |
| 21               | H    | 4.969 556  | 0.292 136  | -0.000 055 |
| 22               | O    | 5.444 932  | 1.138 895  | -0.000 132 |
| 23               | H    | 6.374 484  | 0.897 825  | 0.000 217  |

Table 5: Cartesian coordinates for the optimized geometry for the  $\beta$ -naphthaldehyde water complex (*trans*- $\beta$ -I) observed at the B98/aug-cc-pVQZ level of theory

| Number           | Atom | x          | y          | z          |
|------------------|------|------------|------------|------------|
| $\beta$ -trans-I |      |            |            |            |
| 1                | C    | 0.149 870  | 0.864 806  | 0.007 410  |
| 2                | C    | 1.057 695  | -0.172 742 | 0.006 111  |
| 3                | C    | 0.604 929  | -1.519 462 | 0.000 175  |
| 4                | C    | -0.734 191 | -1.789 480 | -0.004 099 |
| 5                | C    | -3.087 260 | -0.991 951 | -0.007 191 |
| 6                | C    | -3.988 042 | 0.045 145  | -0.005 910 |
| 7                | C    | -3.540 548 | 1.384 993  | -0.000 173 |
| 8                | C    | -2.197 127 | 1.663 884  | 0.004 204  |
| 9                | C    | -1.242 344 | 0.615 999  | 0.003 055  |
| 10               | C    | -1.694 777 | -0.739 708 | -0.002 780 |
| 11               | H    | -1.848 553 | 2.689 844  | 0.008 519  |
| 12               | H    | -4.263 298 | 2.190 804  | 0.000 686  |
| 13               | H    | -5.050 772 | -0.161 999 | -0.009 369 |
| 14               | H    | -3.433 883 | -2.018 461 | -0.011 666 |
| 15               | H    | -1.085 852 | -2.814 438 | -0.008 743 |
| 16               | H    | 1.341 215  | -2.312 272 | -0.001 077 |
| 17               | H    | 0.504 466  | 1.890 520  | 0.011 681  |
| 18               | H    | 2.742 423  | 1.219 775  | 0.015 036  |
| 19               | O    | 3.381 598  | -0.688 503 | 0.010 476  |
| 20               | C    | 2.495 756  | 0.140 902  | 0.010 814  |
| 21               | H    | 5.067 757  | 0.251 782  | -0.011 669 |
| 22               | O    | 5.720 256  | 0.967 674  | -0.032 090 |
| 23               | H    | 6.551 468  | 0.558 816  | 0.211 322  |

Table 6: Cartesian coordinates for the optimized geometry for the  $\beta$ -naphthaldehyde water complex (*trans*- $\beta$ -II) observed at the MP2/aug-cc-pVTZ level of theory

| Number            | Atom | x          | y          | z          |
|-------------------|------|------------|------------|------------|
| $\beta$ -trans-II |      |            |            |            |
| 1                 | C    | -0.095 061 | -1.366 702 | 0.000 003  |
| 2                 | C    | 1.120 578  | -0.706 472 | 0.000 015  |
| 3                 | C    | 1.175 945  | 0.709 118  | 0.000 025  |
| 4                 | C    | 0.005 276  | 1.428 377  | 0.000 020  |
| 5                 | C    | -2.469 208 | 1.508 292  | -0.000 001 |
| 6                 | C    | -3.682 383 | 0.852 760  | -0.000 011 |
| 7                 | C    | -3.731 400 | -0.557 222 | -0.000 012 |
| 8                 | C    | -2.567 591 | -1.294 805 | -0.000 007 |
| 9                 | C    | -1.309 627 | -0.647 519 | 0.000 001  |
| 10                | C    | -1.257 201 | 0.782 091  | 0.000 007  |
| 11                | H    | -2.601 683 | -2.378 129 | -0.000 008 |
| 12                | H    | -4.689 720 | -1.060 304 | -0.000 017 |
| 13                | H    | -4.603 423 | 1.421 276  | -0.000 018 |
| 14                | H    | -2.431 339 | 2.591 448  | -0.000 001 |
| 15                | H    | 0.035 399  | 2.511 985  | 0.000 027  |
| 16                | H    | 2.133 547  | 1.212 922  | 0.000 027  |
| 17                | H    | -0.118 601 | -2.452 723 | 0.000 002  |
| 18                | H    | 2.162 709  | -2.616 409 | -0.000 016 |
| 19                | O    | 3.485 532  | -1.097 396 | -0.000 002 |
| 20                | C    | 2.340 228  | -1.526 138 | -0.000 001 |
| 21                | H    | 4.245 788  | 0.653 557  | -0.000 022 |
| 22                | O    | 4.401 908  | 1.611 067  | -0.000 038 |
| 23                | H    | 5.357 722  | 1.706 465  | 0.000 181  |



Table 7: Cartesian coordinates for the optimized geometry for the  $\beta$ -naphthaldehyde water complex (*trans*- $\beta$ -II) observed at the B98/aug-cc-pVQZ level of theory

| Number            | Atom | x          | y          | z          |
|-------------------|------|------------|------------|------------|
| $\beta$ -trans-II |      |            |            |            |
| 1                 | C    | -0.105 327 | 1.359 358  | -0.004 035 |
| 2                 | C    | 1.110 670  | 0.707 163  | 0.015 213  |
| 3                 | C    | 1.160 016  | -0.714 137 | 0.035 777  |
| 4                 | C    | -0.002 752 | -1.432 517 | 0.035 402  |
| 5                 | C    | -2.486 242 | -1.511 901 | 0.012 997  |
| 6                 | C    | -3.693 187 | -0.856 528 | -0.007 262 |
| 7                 | C    | -3.744 019 | 0.555 350  | -0.026 934 |
| 8                 | C    | -2.583 723 | 1.287 341  | -0.026 037 |
| 9                 | C    | -1.322 198 | 0.640 378  | -0.005 442 |
| 10                | C    | -1.270 208 | -0.787 559 | 0.014 524  |
| 11                | H    | -2.616 866 | 2.370 382  | -0.041 259 |
| 12                | H    | -4.703 433 | 1.056 380  | -0.042 853 |
| 13                | H    | -4.615 900 | -1.423 084 | -0.008 347 |
| 14                | H    | -2.450 798 | -2.594 644 | 0.027 892  |
| 15                | H    | 0.028 750  | -2.515 494 | 0.050 779  |
| 16                | H    | 2.119 071  | -1.215 156 | 0.053 091  |
| 17                | H    | -0.133 400 | 2.444 334  | -0.019 103 |
| 18                | H    | 2.152 317  | 2.618 831  | 0.005 612  |
| 19                | O    | 3.472 245  | 1.107 532  | 0.020 294  |
| 20                | C    | 2.334 541  | 1.525 839  | 0.013 594  |
| 21                | H    | 4.298 516  | -0.646 235 | -0.040 519 |
| 22                | O    | 4.515 602  | -1.588 369 | -0.081 718 |
| 23                | H    | 5.390 092  | -1.665 558 | 0.301 397  |

Table 8: List of assigned rotational transitions for the most stable conformer of  $\alpha$ -naphthaldehyde (*cis*- $\alpha$ -I) and their simulations out of the best fit using SPFIT program

| $J'$ | $K'_a$ | $K'_c$ | $J$ | $K_a$ | $K_c$ | Obs./MHz    | Calc.MHz    | Diff./MHz | Est. error/MHz |
|------|--------|--------|-----|-------|-------|-------------|-------------|-----------|----------------|
| 8    | 0      | 8      | 7   | 1     | 7     | 6032.8139   | 6032.8130   | 0.0009    | 0.002          |
| 9    | 0      | 9      | 8   | 1     | 8     | 6781.8029   | 6781.8022   | 0.0007    | 0.004          |
| 10   | 0      | 10     | 9   | 1     | 9     | 7517.2609   | 7517.2622   | -0.0013   | 0.004          |
| 11   | 0      | 11     | 10  | 1     | 10    | 8244.7380   | 8244.7366   | 0.0014    | 0.002          |
| 12   | 0      | 12     | 11  | 1     | 11    | 8967.6917   | 8967.6876   | 0.0042    | 0.002          |
| 13   | 0      | 13     | 12  | 1     | 12    | 9688.1550   | 9688.1566   | -0.0016   | 0.004          |
| 14   | 0      | 14     | 13  | 1     | 13    | 10 407.3002 | 10 407.2988 | 0.0014    | 0.004          |
| 15   | 0      | 15     | 14  | 1     | 14    | 11 125.7480 | 11 125.7475 | 0.0006    | 0.002          |
| 16   | 0      | 16     | 15  | 1     | 15    | 11 843.8436 | 11 843.8406 | 0.0030    | 0.004          |
| 5    | 0      | 5      | 4   | 0     | 4     | 4002.6664   | 4002.6622   | 0.0042    | 0.002          |
| 6    | 0      | 6      | 5   | 0     | 5     | 4714.6928   | 4714.6915   | 0.0013    | 0.002          |
| 7    | 0      | 7      | 6   | 0     | 6     | 5419.1318   | 5419.1334   | -0.0016   | 0.002          |
| 8    | 0      | 8      | 7   | 0     | 7     | 6124.4673   | 6124.4676   | -0.0003   | 0.002          |
| 9    | 0      | 9      | 8   | 0     | 8     | 6833.2902   | 6833.2905   | -0.0003   | 0.002          |
| 10   | 0      | 10     | 9   | 0     | 9     | 7545.3689   | 7545.3677   | 0.0012    | 0.002          |
| 11   | 0      | 11     | 10  | 0     | 10    | 8259.7446   | 8259.7454   | -0.0008   | 0.002          |
| 12   | 0      | 12     | 11  | 0     | 11    | 8975.5669   | 8975.5651   | 0.0018    | 0.002          |
| 13   | 0      | 13     | 12  | 0     | 12    | 9692.2337   | 9692.2338   | -0.0001   | 0.002          |
| 14   | 0      | 14     | 13  | 0     | 13    | 10 409.3808 | 10 409.3849 | -0.0041   | 0.002          |
| 15   | 0      | 15     | 14  | 0     | 14    | 11 126.8035 | 11 126.8044 | -0.0009   | 0.002          |
| 16   | 0      | 16     | 15  | 0     | 15    | 11 844.3675 | 11 844.3717 | -0.0042   | 0.002          |
| 17   | 0      | 17     | 16  | 0     | 16    | 12 562.0192 | 12 562.0200 | -0.0008   | 0.002          |
| 18   | 0      | 18     | 17  | 0     | 17    | 13 279.7132 | 13 279.7126 | 0.0006    | 0.002          |
| 19   | 0      | 19     | 18  | 0     | 18    | 13 997.4316 | 13 997.4291 | 0.0025    | 0.002          |
| 7    | 1      | 6      | 6   | 1     | 5     | 6176.4221   | 6176.4247   | -0.0026   | 0.002          |
| 8    | 1      | 7      | 7   | 1     | 6     | 6939.8376   | 6939.8366   | 0.0010    | 0.002          |
| 9    | 1      | 8      | 8   | 1     | 7     | 7664.6763   | 7664.6754   | 0.0009    | 0.002          |
| 10   | 1      | 9      | 9   | 1     | 8     | 8364.6362   | 8364.6357   | 0.0005    | 0.002          |
| 11   | 1      | 10     | 10  | 1     | 9     | 9055.5713   | 9055.5733   | -0.0020   | 0.002          |
| 12   | 1      | 11     | 11  | 1     | 10    | 9748.2425   | 9748.2415   | 0.0010    | 0.002          |
| 13   | 1      | 12     | 12  | 1     | 11    | 10 446.8107 | 10 446.8100 | 0.0007    | 0.002          |
| 14   | 1      | 13     | 13  | 1     | 12    | 11 151.3775 | 11 151.3766 | 0.0009    | 0.002          |
| 15   | 1      | 14     | 14  | 1     | 13    | 11 860.5725 | 11 860.5730 | -0.0005   | 0.002          |
| 16   | 1      | 15     | 15  | 1     | 14    | 12 572.9216 | 12 572.9237 | -0.0021   | 0.002          |
| 17   | 1      | 16     | 16  | 1     | 15    | 13 287.2893 | 13 287.2871 | 0.0022    | 0.002          |
| 7    | 2      | 5      | 6   | 2     | 4     | 6400.3341   | 6400.3330   | 0.0011    | 0.002          |
| 8    | 2      | 6      | 7   | 2     | 5     | 7324.3668   | 7324.3662   | 0.0006    | 0.002          |
| 9    | 2      | 7      | 8   | 2     | 6     | 8215.6377   | 8215.6370   | 0.0007    | 0.002          |
| 10   | 2      | 8      | 9   | 2     | 7     | 9066.6741   | 9066.6737   | 0.0004    | 0.002          |
| 11   | 2      | 9      | 10  | 2     | 8     | 9871.2784   | 9871.2798   | -0.0014   | 0.002          |
| 12   | 2      | 10     | 11  | 2     | 9     | 10 627.5119 | 10 627.5119 | 0.0000    | 0.002          |
| 13   | 2      | 11     | 12  | 2     | 10    | 11 341.7148 | 11 341.7147 | 0.0001    | 0.002          |
| 14   | 2      | 12     | 13  | 2     | 11    | 12 028.6718 | 12 028.6733 | -0.0015   | 0.002          |
| 15   | 2      | 13     | 14  | 2     | 12    | 12 705.5829 | 12 705.5838 | -0.0009   | 0.002          |
| 16   | 2      | 14     | 15  | 2     | 13    | 13 384.9316 | 13 384.9315 | 0.0001    | 0.002          |
| 8    | 3      | 5      | 7   | 3     | 4     | 7128.1039   | 7128.1036   | 0.0003    | 0.002          |
| 9    | 3      | 6      | 8   | 3     | 5     | 8110.6799   | 8110.6816   | -0.0017   | 0.002          |
| 10   | 3      | 7      | 9   | 3     | 6     | 9098.6993   | 9098.6993   | 0.0001    | 0.002          |

Continued on next page...

Table 8 – Continued from previous page

| $J'$ | $K'_a$ | $K'_c$ | $J$ | $K_a$ | $K_c$ | Obs./MHz    | Calc./MHz   | Diff./MHz | Est. error/MHz |
|------|--------|--------|-----|-------|-------|-------------|-------------|-----------|----------------|
| 11   | 3      | 8      | 10  | 3     | 7     | 10 072.5012 | 10 072.5030 | -0.0018   | 0.002          |
| 12   | 3      | 9      | 11  | 3     | 8     | 11 016.3562 | 11 016.3545 | 0.0017    | 0.002          |
| 14   | 3      | 11     | 13  | 3     | 10    | 12 775.1907 | 12 775.1871 | 0.0036    | 0.002          |
| 15   | 3      | 12     | 14  | 3     | 11    | 13 577.7229 | 13 577.7251 | -0.0022   | 0.002          |
| 8    | 4      | 4      | 7   | 4     | 3     | 6947.7715   | 6947.7736   | -0.0021   | 0.002          |
| 9    | 4      | 5      | 8   | 4     | 4     | 7857.2378   | 7857.2371   | 0.0007    | 0.002          |
| 10   | 4      | 6      | 9   | 4     | 5     | 8789.4010   | 8789.4034   | -0.0024   | 0.002          |
| 11   | 4      | 7      | 10  | 4     | 6     | 9749.6307   | 9749.6300   | 0.0007    | 0.002          |
| 15   | 4      | 11     | 14  | 4     | 10    | 13 757.3733 | 13 757.3741 | -0.0008   | 0.002          |
| 9    | 5      | 4      | 8   | 5     | 3     | 7783.6282   | 7783.6261   | 0.0021    | 0.002          |
| 10   | 5      | 5      | 9   | 5     | 4     | 8671.9507   | 8671.9492   | 0.0015    | 0.002          |
| 11   | 5      | 6      | 10  | 5     | 5     | 9570.3807   | 9570.3825   | -0.0018   | 0.002          |
| 5    | 1      | 5      | 4   | 1     | 4     | 3870.4139   | 3870.4143   | -0.0004   | 0.002          |
| 6    | 1      | 6      | 5   | 1     | 5     | 4616.4855   | 4616.4865   | -0.0010   | 0.002          |
| 7    | 1      | 7      | 6   | 1     | 6     | 5353.8078   | 5353.8086   | -0.0008   | 0.002          |
| 8    | 1      | 8      | 7   | 1     | 7     | 6084.3004   | 6084.3013   | -0.0009   | 0.002          |
| 9    | 1      | 9      | 8   | 1     | 8     | 6809.9070   | 6809.9077   | -0.0007   | 0.002          |
| 10   | 1      | 10     | 9   | 1     | 9     | 7532.2696   | 7532.2709   | -0.0013   | 0.002          |
| 11   | 1      | 11     | 10  | 1     | 10    | 8252.6152   | 8252.6142   | 0.0010    | 0.002          |
| 12   | 1      | 12     | 11  | 1     | 11    | 8971.7667   | 8971.7648   | 0.0019    | 0.002          |
| 13   | 1      | 13     | 12  | 1     | 12    | 9690.2416   | 9690.2426   | -0.0010   | 0.002          |
| 14   | 1      | 14     | 13  | 1     | 13    | 10 408.3548 | 10 408.3558 | -0.0010   | 0.002          |
| 15   | 1      | 15     | 14  | 1     | 14    | 11 126.2763 | 11 126.2785 | -0.0022   | 0.002          |
| 16   | 1      | 16     | 15  | 1     | 15    | 11 844.1029 | 11 844.1056 | -0.0027   | 0.002          |
| 17   | 1      | 17     | 16  | 1     | 16    | 12 561.8837 | 12 561.8864 | -0.0027   | 0.002          |
| 18   | 1      | 18     | 17  | 1     | 17    | 13 279.6480 | 13 279.6460 | 0.0020    | 0.002          |
| 19   | 1      | 19     | 18  | 1     | 18    | 13 997.3991 | 13 997.3961 | 0.0030    | 0.002          |
| 20   | 1      | 20     | 19  | 1     | 19    | 14 715.1409 | 14 715.1421 | -0.0012   | 0.002          |
| 8    | 2      | 7      | 7   | 2     | 6     | 6643.7730   | 6643.7725   | 0.0005    | 0.002          |
| 9    | 2      | 8      | 8   | 2     | 7     | 7417.9830   | 7417.9820   | 0.0010    | 0.002          |
| 10   | 2      | 9      | 9   | 2     | 8     | 8178.1643   | 8178.1645   | -0.0002   | 0.002          |
| 11   | 2      | 10     | 10  | 2     | 9     | 8926.1775   | 8926.1758   | 0.0017    | 0.002          |
| 12   | 2      | 11     | 11  | 2     | 10    | 9664.3651   | 9664.3661   | -0.0010   | 0.002          |
| 13   | 2      | 12     | 12  | 2     | 11    | 10 395.1749 | 10 395.1741 | 0.0008    | 0.002          |
| 14   | 2      | 13     | 13  | 2     | 12    | 11 120.7937 | 11 120.7935 | 0.0002    | 0.002          |
| 16   | 2      | 15     | 15  | 2     | 14    | 12 563.0405 | 12 563.0430 | -0.0025   | 0.002          |
| 17   | 2      | 16     | 16  | 2     | 15    | 13 281.8389 | 13 281.8393 | -0.0004   | 0.002          |
| 18   | 2      | 17     | 17  | 2     | 16    | 13 999.9336 | 13 999.9330 | 0.0006    | 0.002          |
| 7    | 3      | 5      | 6   | 3     | 4     | 6042.5255   | 6042.5249   | 0.0006    | 0.002          |
| 8    | 3      | 6      | 7   | 3     | 5     | 6901.0930   | 6901.0951   | -0.0021   | 0.002          |
| 9    | 3      | 7      | 8   | 3     | 6     | 7749.2226   | 7749.2216   | 0.0010    | 0.002          |
| 10   | 3      | 8      | 9   | 3     | 7     | 8583.7901   | 8583.7922   | -0.0021   | 0.002          |
| 11   | 3      | 9      | 10  | 3     | 8     | 9402.5698   | 9402.5700   | -0.0002   | 0.002          |
| 12   | 3      | 10     | 11  | 3     | 9     | 10 204.3742 | 10 204.3734 | 0.0008    | 0.002          |
| 13   | 3      | 11     | 12  | 3     | 10    | 10 989.1485 | 10 989.1494 | -0.0009   | 0.002          |
| 16   | 3      | 14     | 15  | 3     | 13    | 13 255.6848 | 13 255.6830 | 0.0018    | 0.002          |
| 17   | 3      | 15     | 16  | 3     | 14    | 13 989.7689 | 13 989.7688 | 0.0001    | 0.002          |
| 7    | 4      | 4      | 6   | 4     | 3     | 6047.1615   | 6047.1620   | -0.0005   | 0.002          |
| 8    | 4      | 5      | 7   | 4     | 4     | 6926.8346   | 6926.8343   | 0.0003    | 0.002          |
| 9    | 4      | 6      | 8   | 4     | 5     | 7808.9943   | 7808.9957   | -0.0014   | 0.002          |
| 10   | 4      | 7      | 9   | 4     | 6     | 8691.0423   | 8691.0396   | 0.0027    | 0.002          |
| 11   | 4      | 8      | 10  | 4     | 7     | 9569.5403   | 9569.5398   | 0.0005    | 0.002          |
| 15   | 4      | 12     | 14  | 4     | 11    | 12 974.5406 | 12 974.5401 | 0.0006    | 0.002          |

Continued on next page. . .

Table 8 – Continued from previous page

| $J'$ | $K'_a$ | $K'_c$ | $J$ | $K_a$ | $K_c$ | Obs./MHz    | Calc./MHz   | Diff./MHz | Est. error/MHz |
|------|--------|--------|-----|-------|-------|-------------|-------------|-----------|----------------|
| 16   | 4      | 13     | 15  | 4     | 12    | 13 784.9113 | 13 784.9111 | 0.0002    | 0.002          |
| 9    | 5      | 5      | 8   | 5     | 4     | 7781.1181   | 7781.1168   | 0.0013    | 0.002          |
| 10   | 5      | 6      | 9   | 5     | 5     | 8665.0801   | 8665.0813   | -0.0012   | 0.002          |
| 9    | 1      | 9      | 8   | 0     | 8     | 6861.3915   | 6861.3959   | -0.0044   | 0.004          |
| 10   | 1      | 10     | 9   | 0     | 9     | 7560.3794   | 7560.3764   | 0.0030    | 0.004          |
| 11   | 1      | 11     | 10  | 0     | 10    | 8267.6249   | 8267.6229   | 0.0020    | 0.002          |
| 12   | 1      | 12     | 11  | 0     | 11    | 8979.6432   | 8979.6423   | 0.0009    | 0.002          |
| 13   | 1      | 13     | 12  | 0     | 12    | 9694.3198   | 9694.3199   | -0.0001   | 0.004          |
| 14   | 1      | 14     | 13  | 0     | 13    | 10 410.4441 | 10 410.4418 | 0.0023    | 0.004          |
| 15   | 1      | 15     | 14  | 0     | 14    | 11 127.3368 | 11 127.3355 | 0.0013    | 0.002          |
| 16   | 1      | 16     | 15  | 0     | 15    | 11 844.6362 | 11 844.6367 | -0.0005   | 0.004          |

Table 9: List of assigned rotational transitions for the second most stable conformer of  $\beta$ -naphthaldehyde (*trans*- $\beta$ -I) and their simulations out of the best fit using SPFIT program

| $J'$ | $K'_a$ | $K'_c$ | $J$ | $K_a$ | $K_c$ | Obs./MHz  | Calc.MHz  | Diff./MHz | Est. error/MHz |
|------|--------|--------|-----|-------|-------|-----------|-----------|-----------|----------------|
| 8    | 0      | 8      | 7   | 0     | 7     | 5068.8528 | 5068.8522 | 0.0006    | 0.002          |
| 9    | 0      | 9      | 8   | 0     | 8     | 5684.5666 | 5684.5663 | 0.0003    | 0.002          |
| 10   | 0      | 10     | 9   | 0     | 9     | 6295.2149 | 6295.2152 | -0.0003   | 0.002          |
| 11   | 0      | 11     | 10  | 0     | 10    | 6901.0905 | 6901.0909 | -0.0004   | 0.002          |
| 12   | 0      | 12     | 11  | 0     | 11    | 7502.7357 | 7502.7370 | -0.0013   | 0.002          |
| 13   | 0      | 13     | 12  | 0     | 12    | 8100.8832 | 8100.8833 | -0.0001   | 0.001          |
| 14   | 0      | 14     | 13  | 0     | 13    | 8696.3517 | 8696.3514 | 0.0003    | 0.001          |
| 15   | 0      | 15     | 14  | 0     | 14    | 9289.9571 | 9289.9554 | 0.0017    | 0.002          |
| 16   | 0      | 16     | 15  | 0     | 15    | 9882.4280 | 9882.4220 | 0.0060    | 0.004          |
| 8    | 1      | 7      | 7   | 1     | 6     | 5296.2419 | 5296.2373 | 0.0046    | 0.002          |
| 9    | 1      | 8      | 8   | 1     | 7     | 5952.4827 | 5952.4822 | 0.0005    | 0.002          |
| 10   | 1      | 9      | 9   | 1     | 8     | 6606.4412 | 6606.4379 | 0.0033    | 0.002          |
| 11   | 1      | 10     | 10  | 1     | 9     | 7257.7190 | 7257.7172 | 0.0019    | 0.002          |
| 12   | 1      | 11     | 11  | 1     | 10    | 7905.8992 | 7905.8985 | 0.0007    | 0.002          |
| 13   | 1      | 12     | 12  | 1     | 11    | 8550.5301 | 8550.5316 | -0.0015   | 0.002          |
| 14   | 1      | 13     | 13  | 1     | 12    | 9191.1433 | 9191.1485 | -0.0052   | 0.002          |
| 10   | 2      | 8      | 9   | 2     | 7     | 6516.7601 | 6516.7573 | 0.0028    | 0.002          |
| 11   | 2      | 9      | 10  | 2     | 8     | 7186.9456 | 7186.9434 | 0.0022    | 0.004          |
| 12   | 2      | 10     | 11  | 2     | 9     | 7859.8570 | 7859.8549 | 0.0021    | 0.004          |
| 13   | 2      | 11     | 12  | 2     | 10    | 8534.5996 | 8534.5993 | 0.0003    | 0.002          |
| 14   | 2      | 12     | 13  | 2     | 11    | 9210.1777 | 9210.1803 | -0.0026   | 0.002          |
| 10   | 3      | 7      | 9   | 3     | 6     | 6437.0456 | 6437.0457 | -0.0001   | 0.002          |
| 12   | 3      | 9      | 11  | 3     | 8     | 7737.5534 | 7737.5547 | -0.0013   | 0.002          |
| 9    | 1      | 9      | 8   | 1     | 8     | 5550.8602 | 5550.8637 | -0.0035   | 0.002          |
| 10   | 1      | 10     | 9   | 1     | 9     | 6162.5302 | 6162.5315 | -0.0013   | 0.002          |
| 11   | 1      | 11     | 10  | 1     | 10    | 6772.8708 | 6772.8729 | -0.0021   | 0.002          |
| 12   | 1      | 12     | 11  | 1     | 11    | 7381.8808 | 7381.8808 | 0.0000    | 0.002          |
| 13   | 1      | 13     | 12  | 1     | 12    | 7989.5738 | 7989.5730 | 0.0008    | 0.002          |
| 14   | 1      | 14     | 13  | 1     | 13    | 8595.9893 | 8595.9902 | -0.0009   | 0.002          |
| 15   | 1      | 15     | 14  | 1     | 14    | 9201.1949 | 9201.1918 | 0.0031    | 0.002          |
| 10   | 2      | 9      | 9   | 2     | 8     | 6396.1939 | 6396.1982 | -0.0043   | 0.002          |
| 11   | 2      | 10     | 10  | 2     | 9     | 7030.8218 | 7030.8211 | 0.0007    | 0.002          |
| 12   | 2      | 11     | 11  | 2     | 10    | 7664.0418 | 7664.0433 | -0.0015   | 0.002          |
| 13   | 2      | 12     | 12  | 2     | 11    | 8295.7551 | 8295.7559 | -0.0008   | 0.002          |
| 10   | 3      | 8      | 9   | 3     | 7     | 6430.3797 | 6430.3783 | 0.0014    | 0.002          |
| 12   | 3      | 10     | 11  | 3     | 9     | 7720.9093 | 7720.9073 | 0.0020    | 0.002          |

Table 10: List of assigned rotational transitions for the most stable conformer of  $\beta$ -naphthaldehyde (*trans*- $\beta$ -II) and their simulations out of the best fit using SPFIT program

| $J'$ | $K'_a$ | $K'_c$ | $J$ | $K_a$ | $K_c$ | Obs./MHz    | Calc.MHz    | Diff./MHz | Est. error/MHz |
|------|--------|--------|-----|-------|-------|-------------|-------------|-----------|----------------|
| 10   | 0      | 10     | 9   | 1     | 9     | 6520.8689   | 6520.8701   | -0.0012   | 0.0020         |
| 11   | 0      | 11     | 10  | 1     | 10    | 7297.1015   | 7297.1007   | 0.0008    | 0.0020         |
| 12   | 0      | 12     | 11  | 1     | 11    | 8053.3278   | 8053.3297   | -0.0019   | 0.0020         |
| 13   | 0      | 13     | 12  | 1     | 12    | 8791.3750   | 8791.3746   | 0.0004    | 0.0020         |
| 14   | 0      | 14     | 13  | 1     | 13    | 9513.7464   | 9513.7459   | 0.0005    | 0.0020         |
| 15   | 0      | 15     | 14  | 1     | 14    | 10 223.1460 | 10 223.1442 | 0.0018    | 0.0020         |
| 16   | 0      | 16     | 15  | 1     | 15    | 10 922.1352 | 10 922.1347 | 0.0005    | 0.0020         |
| 17   | 0      | 17     | 16  | 1     | 16    | 11 612.9773 | 11 612.9767 | 0.0006    | 0.0020         |
| 18   | 0      | 18     | 17  | 1     | 17    | 12 297.5613 | 12 297.5618 | -0.0005   | 0.0020         |
| 19   | 0      | 19     | 18  | 1     | 18    | 12 977.4175 | 12 977.4174 | 0.0001    | 0.0020         |
| 20   | 0      | 20     | 19  | 1     | 19    | 13 653.7451 | 13 653.7442 | 0.0009    | 0.0020         |
| 9    | 0      | 9      | 8   | 0     | 8     | 6390.0765   | 6390.0765   | 0.0000    | 0.0020         |
| 10   | 0      | 10     | 9   | 0     | 9     | 7056.9981   | 7056.9980   | 0.0002    | 0.0020         |
| 11   | 0      | 11     | 10  | 0     | 10    | 7719.6608   | 7719.6620   | -0.0012   | 0.0020         |
| 12   | 0      | 12     | 11  | 0     | 11    | 8380.1894   | 8380.1908   | -0.0014   | 0.0020         |
| 13   | 0      | 13     | 12  | 0     | 12    | 9040.1414   | 9040.1424   | -0.0010   | 0.0020         |
| 14   | 0      | 14     | 13  | 0     | 13    | 9700.4781   | 9700.4781   | 0.0001    | 0.0020         |
| 15   | 0      | 15     | 14  | 0     | 14    | 10 361.6761 | 10 361.6758 | 0.0003    | 0.0020         |
| 16   | 0      | 16     | 15  | 0     | 15    | 11 023.8881 | 11 023.8888 | -0.0007   | 0.0020         |
| 17   | 0      | 17     | 16  | 0     | 16    | 11 687.0847 | 11 687.0841 | 0.0006    | 0.0020         |
| 18   | 0      | 18     | 17  | 0     | 17    | 12 351.1403 | 12 351.1406 | -0.0003   | 0.0020         |
| 19   | 0      | 19     | 18  | 0     | 18    | 13 015.9076 | 13 015.9091 | -0.0015   | 0.0020         |
| 20   | 0      | 20     | 19  | 0     | 19    | 13 681.2433 | 13 681.2436 | -0.0003   | 0.0020         |
| 8    | 1      | 7      | 7   | 1     | 6     | 6117.7333   | 6117.7338   | -0.0005   | 0.0020         |
| 9    | 1      | 8      | 8   | 1     | 7     | 6863.3154   | 6863.3153   | 0.0002    | 0.0020         |
| 10   | 1      | 9      | 9   | 1     | 8     | 7600.8875   | 7600.8874   | 0.0001    | 0.0020         |
| 11   | 1      | 10     | 10  | 1     | 9     | 8329.0663   | 8329.0670   | -0.0007   | 0.0020         |
| 12   | 1      | 11     | 11  | 1     | 10    | 9046.5714   | 9046.5714   | 0.0000    | 0.0020         |
| 13   | 1      | 12     | 12  | 1     | 11    | 9752.4291   | 9752.4287   | 0.0004    | 0.0020         |
| 14   | 1      | 13     | 13  | 1     | 12    | 10 446.2317 | 10 446.2314 | 0.0003    | 0.0020         |
| 15   | 1      | 14     | 14  | 1     | 13    | 11 128.3653 | 11 128.3648 | 0.0005    | 0.0020         |
| 16   | 1      | 15     | 15  | 1     | 14    | 11 800.1034 | 11 800.1030 | 0.0004    | 0.0020         |
| 17   | 1      | 16     | 16  | 1     | 15    | 12 463.4883 | 12 463.4885 | -0.0002   | 0.0020         |
| 18   | 1      | 17     | 17  | 1     | 16    | 13 120.9990 | 13 120.9982 | 0.0008    | 0.0020         |
| 19   | 1      | 18     | 18  | 1     | 17    | 13 775.1109 | 13 775.1116 | -0.0007   | 0.0020         |
| 20   | 1      | 19     | 19  | 1     | 18    | 14 427.9382 | 14 427.9387 | -0.0005   | 0.0020         |
| 8    | 2      | 6      | 7   | 2     | 5     | 6040.2265   | 6040.2274   | -0.0009   | 0.0020         |
| 9    | 2      | 7      | 8   | 2     | 6     | 6826.1484   | 6826.1484   | 0.0000    | 0.0020         |
| 10   | 2      | 8      | 9   | 2     | 7     | 7615.0391   | 7615.0405   | -0.0014   | 0.0020         |
| 11   | 2      | 9      | 10  | 2     | 8     | 8403.9461   | 8403.9448   | 0.0013    | 0.0020         |
| 12   | 2      | 10     | 11  | 2     | 9     | 9190.1248   | 9190.1239   | 0.0009    | 0.0020         |
| 13   | 2      | 11     | 12  | 2     | 10    | 9971.3123   | 9971.3122   | 0.0001    | 0.0020         |
| 14   | 2      | 12     | 13  | 2     | 11    | 10 745.7303 | 10 745.7304 | -0.0001   | 0.0020         |
| 15   | 2      | 13     | 14  | 2     | 12    | 11 511.9590 | 11 511.9593 | -0.0003   | 0.0020         |
| 16   | 2      | 14     | 15  | 2     | 13    | 12 268.7830 | 12 268.7831 | -0.0001   | 0.0020         |
| 17   | 2      | 15     | 16  | 2     | 14    | 13 015.0755 | 13 015.0752 | 0.0003    | 0.0020         |
| 18   | 2      | 16     | 17  | 2     | 15    | 13 749.7624 | 13 749.7629 | -0.0005   | 0.0020         |
| 11   | 3      | 8      | 10  | 3     | 7     | 8201.4590   | 8201.4592   | -0.0002   | 0.0020         |

Continued on next page...

Table 10 – Continued from previous page

| $J'$ | $K'_a$ | $K'_c$ | $J$ | $K_a$ | $K_c$ | Obs./MHz    | Calc./MHz   | Diff./MHz | Est. error/MHz |
|------|--------|--------|-----|-------|-------|-------------|-------------|-----------|----------------|
| 12   | 3      | 9      | 11  | 3     | 8     | 8973.2888   | 8973.2890   | -0.0002   | 0.0020         |
| 13   | 3      | 10     | 12  | 3     | 9     | 9753.2101   | 9753.2097   | 0.0004    | 0.0020         |
| 14   | 3      | 11     | 13  | 3     | 10    | 10 541.2912 | 10 541.2913 | -0.0001   | 0.0020         |
| 15   | 3      | 12     | 14  | 3     | 11    | 11 336.7868 | 11 336.7873 | -0.0005   | 0.0020         |
| 11   | 4      | 7      | 10  | 4     | 6     | 8142.4406   | 8142.4401   | 0.0005    | 0.0020         |
| 12   | 4      | 8      | 11  | 4     | 7     | 8891.0095   | 8891.0101   | -0.0006   | 0.0020         |
| 13   | 4      | 9      | 12  | 4     | 8     | 9642.3441   | 9642.3438   | 0.0003    | 0.0020         |
| 14   | 4      | 10     | 13  | 4     | 9     | 10 397.0214 | 10 397.0209 | 0.0006    | 0.0020         |
| 15   | 4      | 11     | 14  | 4     | 10    | 11 155.7415 | 11 155.7408 | 0.0007    | 0.0020         |
| 9    | 1      | 9      | 8   | 1     | 8     | 6260.2807   | 6260.2814   | -0.0007   | 0.0020         |
| 10   | 1      | 10     | 9   | 1     | 9     | 6943.4313   | 6943.4314   | -0.0001   | 0.0020         |
| 11   | 1      | 11     | 10  | 1     | 10    | 7623.9624   | 7623.9617   | 0.0007    | 0.0020         |
| 12   | 1      | 12     | 11  | 1     | 11    | 8302.0973   | 8302.0975   | -0.0002   | 0.0020         |
| 13   | 1      | 13     | 12  | 1     | 12    | 8978.1065   | 8978.1067   | -0.0002   | 0.0020         |
| 14   | 1      | 14     | 13  | 1     | 13    | 9652.2789   | 9652.2775   | 0.0014    | 0.0020         |
| 15   | 1      | 15     | 14  | 1     | 14    | 10 324.8975 | 10 324.8984 | -0.0009   | 0.0020         |
| 16   | 1      | 16     | 15  | 1     | 15    | 10 996.2420 | 10 996.2421 | -0.0001   | 0.0020         |
| 17   | 1      | 17     | 16  | 1     | 16    | 11 666.5547 | 11 666.5555 | -0.0008   | 0.0020         |
| 18   | 1      | 18     | 17  | 1     | 17    | 12 336.0538 | 12 336.0534 | 0.0004    | 0.0020         |
| 19   | 1      | 19     | 18  | 1     | 18    | 13 004.9163 | 13 004.9168 | -0.0005   | 0.0020         |
| 20   | 1      | 20     | 19  | 1     | 19    | 13 673.2951 | 13 673.2942 | 0.0009    | 0.0020         |
| 10   | 2      | 9      | 9   | 2     | 8     | 7307.7402   | 7307.7398   | 0.0004    | 0.0020         |
| 11   | 2      | 10     | 10  | 2     | 9     | 8024.1543   | 8024.1549   | -0.0006   | 0.0020         |
| 12   | 2      | 11     | 11  | 2     | 10    | 8736.7410   | 8736.7401   | 0.0009    | 0.0020         |
| 13   | 2      | 12     | 12  | 2     | 11    | 9445.3252   | 9445.3249   | 0.0003    | 0.0020         |
| 14   | 2      | 13     | 13  | 2     | 12    | 10 149.8082 | 10 149.8077 | 0.0005    | 0.0020         |
| 15   | 2      | 14     | 14  | 2     | 13    | 10 850.1643 | 10 850.1641 | 0.0002    | 0.0020         |
| 16   | 2      | 15     | 15  | 2     | 14    | 11 546.4507 | 11 546.4501 | 0.0006    | 0.0020         |
| 17   | 2      | 16     | 16  | 2     | 15    | 12 238.8017 | 12 238.8011 | 0.0007    | 0.0020         |
| 18   | 2      | 17     | 17  | 2     | 16    | 12 927.4267 | 12 927.4260 | 0.0008    | 0.0020         |
| 19   | 2      | 18     | 18  | 2     | 17    | 13 612.5943 | 13 612.5959 | -0.0016   | 0.0020         |
| 11   | 3      | 9      | 10  | 3     | 8     | 8143.0194   | 8143.0190   | 0.0004    | 0.0020         |
| 12   | 3      | 10     | 11  | 3     | 9     | 8884.8903   | 8884.8898   | 0.0005    | 0.0020         |
| 13   | 3      | 11     | 12  | 3     | 10    | 9625.4159   | 9625.4154   | 0.0005    | 0.0020         |
| 14   | 3      | 12     | 13  | 3     | 11    | 10 364.0326 | 10 364.0332 | -0.0006   | 0.0020         |
| 15   | 3      | 13     | 14  | 3     | 12    | 11 100.1916 | 11 100.1922 | -0.0006   | 0.0020         |
| 11   | 4      | 8      | 10  | 4     | 7     | 8139.6191   | 8139.6191   | 0.0000    | 0.0020         |
| 12   | 4      | 9      | 11  | 4     | 8     | 8885.7609   | 8885.7620   | -0.0011   | 0.0020         |
| 13   | 4      | 10     | 12  | 4     | 9     | 9633.1079   | 9633.1082   | -0.0003   | 0.0020         |
| 14   | 4      | 11     | 13  | 4     | 10    | 10 381.5237 | 10 381.5235 | 0.0002    | 0.0020         |
| 15   | 4      | 12     | 14  | 4     | 11    | 11 130.7959 | 11 130.7961 | -0.0002   | 0.0020         |
| 9    | 1      | 9      | 8   | 0     | 8     | 6926.2037   | 6926.2043   | -0.0006   | 0.0020         |
| 10   | 1      | 10     | 9   | 0     | 9     | 7479.5585   | 7479.5592   | -0.0007   | 0.0020         |
| 11   | 1      | 11     | 10  | 0     | 10    | 8046.5225   | 8046.5230   | -0.0005   | 0.0020         |
| 12   | 1      | 12     | 11  | 0     | 11    | 8628.9592   | 8628.9586   | 0.0006    | 0.0020         |
| 13   | 1      | 13     | 12  | 0     | 12    | 9226.8747   | 9226.8745   | 0.0002    | 0.0020         |
| 14   | 1      | 14     | 13  | 0     | 13    | 9839.0118   | 9839.0096   | 0.0022    | 0.0020         |
| 15   | 1      | 15     | 14  | 0     | 14    | 10 463.4306 | 10 463.4299 | 0.0007    | 0.0020         |
| 16   | 1      | 16     | 15  | 0     | 15    | 11 097.9970 | 11 097.9963 | 0.0007    | 0.0020         |
| 17   | 1      | 17     | 16  | 0     | 16    | 11 740.6607 | 11 740.6630 | -0.0023   | 0.0020         |
| 18   | 1      | 18     | 17  | 0     | 17    | 12 389.6336 | 12 389.6323 | 0.0013    | 0.0020         |
| 19   | 1      | 19     | 18  | 0     | 18    | 13 043.4080 | 13 043.4085 | -0.0005   | 0.0020         |

Table 11: Calculated natural charges of *cis*- $\alpha$ -naphthaldehyde and its hydrate *cis*- $\alpha$ -I, and the electronic charge variation

| n° | Atom | <i>cis</i> - $\alpha$<br>Charge | <i>cis</i> - $\alpha$ -I<br>Charge | Variation / % |
|----|------|---------------------------------|------------------------------------|---------------|
| 1  | C    | -0.097                          | -0.103                             | -6            |
| 2  | C    | -0.189                          | -0.181                             | 4             |
| 3  | C    | -0.243                          | -0.240                             | 1             |
| 4  | C    | -0.105                          | -0.101                             | 4             |
| 5  | C    | -0.146                          | -0.222                             | -52           |
| 6  | C    | -0.218                          | -0.135                             | 38            |
| 7  | C    | -0.201                          | -0.233                             | -16           |
| 8  | C    | -0.164                          | -0.165                             | -1            |
| 9  | C    | 0.001                           | 0.021                              | 2000          |
| 10 | C    | -0.103                          | -0.090                             | 12            |
| 11 | H    | 0.230                           | 0.229                              | 0             |
| 12 | H    | 0.211                           | 0.212                              | 0             |
| 13 | H    | 0.215                           | 0.206                              | -4            |
| 14 | H    | 0.199                           | 0.211                              | 6             |
| 15 | H    | 0.201                           | 0.202                              | 1             |
| 16 | H    | 0.217                           | 0.219                              | 1             |
| 17 | H    | 0.214                           | 0.218                              | 2             |
| 18 | H    | 0.108                           | 0.137                              | 26            |
| 19 | O    | -0.491                          | -0.523                             | -7            |
| 20 | C    | 0.361                           | 0.359                              | 0             |
| 21 | H    | -                               | 0.476                              | -             |
| 22 | O    | -                               | -0.959                             | -             |
| 23 | H    | -                               | 0.463                              | -             |

Variation stands for  $\left( \frac{\text{charge in monomer} - \text{charge in hydrate}}{\text{charge in monomer}} \times 100 \right)$



Table 12: Calculated natural charges of *trans*- $\beta$ -naphthaldehyde and its hydrate *trans*- $\beta$ -I, and the electronic charge variation

| n° | Atom | <i>trans</i> - $\beta$<br>Charge | <i>trans</i> - $\beta$ -I<br>Charge | Variation / % |
|----|------|----------------------------------|-------------------------------------|---------------|
| 1  | C    | -0.100                           | -0.128                              | -29           |
| 2  | C    | -0.122                           | -0.117                              | 4             |
| 3  | C    | -0.167                           | -0.222                              | -33           |
| 4  | C    | -0.189                           | -0.185                              | 2             |
| 5  | C    | -0.131                           | -0.221                              | -69           |
| 6  | C    | -0.236                           | -0.145                              | 38            |
| 7  | C    | -0.229                           | -0.252                              | -10           |
| 8  | C    | -0.116                           | -0.149                              | -28           |
| 9  | C    | -0.145                           | -0.012                              | 92            |
| 10 | C    | 0.000                            | -0.005                              | -1141         |
| 11 | H    | 0.200                            | 0.198                               | -1            |
| 12 | H    | 0.217                            | 0.215                               | -1            |
| 13 | H    | 0.215                            | 0.207                               | -4            |
| 14 | H    | 0.198                            | 0.209                               | 6             |
| 15 | H    | 0.207                            | 0.214                               | 4             |
| 16 | H    | 0.221                            | 0.233                               | 6             |
| 17 | H    | 0.195                            | 0.195                               | 0             |
| 18 | H    | 0.109                            | 0.135                               | 24            |
| 19 | O    | -0.483                           | -0.513                              | -6            |
| 20 | C    | 0.356                            | 0.361                               | 1             |
| 21 | H    | -                                | 0.477                               | -             |
| 22 | O    | -                                | -0.960                              | -             |
| 23 | H    | -                                | 0.463                               | -             |

Variation stands for  $\left( \frac{\text{charge in monomer} - \text{charge in hydrate}}{\text{charge in monomer}} \times 100 \right)$

Table 13: Calculated natural charges of *trans*- $\beta$ -naphthaldehyde and its hydrate *trans*- $\beta$ -II, and the electronic charge variation

| n° | Atom | <i>trans</i> - $\beta$<br>Charge | <i>trans</i> - $\beta$ -II<br>Charge | Variation / % |
|----|------|----------------------------------|--------------------------------------|---------------|
| 1  | C    | -0.100                           | -0.138                               | -38           |
| 2  | C    | -0.122                           | -0.118                               | 3             |
| 3  | C    | -0.167                           | -0.225                               | -35           |
| 4  | C    | -0.189                           | -0.124                               | 35            |
| 5  | C    | -0.131                           | -0.221                               | -68           |
| 6  | C    | -0.236                           | -0.150                               | 36            |
| 7  | C    | -0.229                           | -0.229                               | 0             |
| 8  | C    | -0.116                           | -0.208                               | -79           |
| 9  | C    | -0.145                           | -0.029                               | 80            |
| 10 | C    | 0.000                            | -0.013                               | -2936         |
| 11 | H    | 0.200                            | 0.214                                | 7             |
| 12 | H    | 0.217                            | 0.216                                | -1            |
| 13 | H    | 0.215                            | 0.203                                | -6            |
| 14 | H    | 0.198                            | 0.215                                | 8             |
| 15 | H    | 0.207                            | 0.201                                | -3            |
| 16 | H    | 0.221                            | 0.249                                | 13            |
| 17 | H    | 0.195                            | 0.198                                | 2             |
| 18 | H    | 0.109                            | 0.117                                | 7             |
| 19 | O    | -0.483                           | -0.520                               | -8            |
| 20 | C    | 0.356                            | 0.377                                | 6             |
| 21 | H    | -                                | 0.484                                | -             |
| 22 | O    | -                                | -0.962                               | -             |
| 23 | H    | -                                | 0.465                                | -             |

Variation stands for  $\left( \frac{\text{charge in monomer} - \text{charge in hydrate}}{\text{charge in monomer}} \times 100 \right)$

Table 14: Structures, relative energies, rotational constants and dipole moment components of the most stables dihydrates for  $\alpha$ -naphthaldehyde at MP2/aug-cc-pVTZ level of theory.

| species                         | <i>cis</i> - $\alpha$ -I-II | <i>cis</i> - $\alpha$ -II-III | <i>trans</i> - $\alpha$ -I-II | <i>trans</i> - $\alpha$ -II-III |
|---------------------------------|-----------------------------|-------------------------------|-------------------------------|---------------------------------|
| $\Delta E / \text{kJ.mol}^{-1}$ | 0.0                         | 2.8                           | 1.5                           | 7.7                             |
| A / MHz                         | 1136.2                      | 869.4                         | 935.0                         | 1174.2                          |
| B / MHz                         | 357.2                       | 473.3                         | 432.7                         | 380.6                           |
| C / MHz                         | 272.0                       | 308.1                         | 296.2                         | 293.8                           |
| $\mu_a / \text{D}$              | -2.3                        | -3.2                          | -1.8                          | -2.7                            |
| $\mu_b / \text{D}$              | 0.7                         | 1.2                           | -0.1                          | -0.4                            |
| $\mu_c / \text{D}$              | 0.3                         | -0.4                          | -0.2                          | 0.6                             |

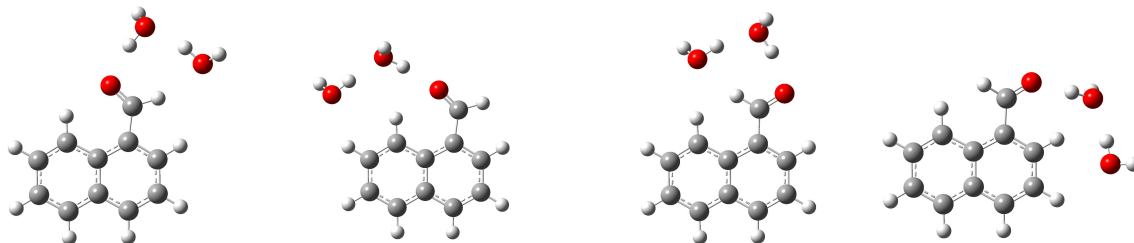

Table 15: Structures, relative energies, rotational constants and dipole moment components of the most stables dihydrates for  $\beta$ -naphthaldehyde at MP2/aug-cc-pVTZ level of theory.

| species                         | <i>cis</i> - $\beta$ -I-II | <i>cis</i> - $\beta$ -II-III | <i>trans</i> - $\beta$ -I-II | <i>trans</i> - $\beta$ -II-III |
|---------------------------------|----------------------------|------------------------------|------------------------------|--------------------------------|
| $\Delta E / \text{kJ.mol}^{-1}$ | 3.6                        | 0.9                          | 0.0                          | 2.3                            |
| A / MHz                         | 1763.1                     | 835.0                        | 1516.2                       | 1208.4                         |
| B / MHz                         | 256.6                      | 456.7                        | 269.2                        | 327.3                          |
| C / MHz                         | 224.2                      | 296.1                        | 228.8                        | 257.9                          |
| $\mu_a / \text{D}$              | -3.5                       | -2.0                         | -3.6                         | 3.4                            |
| $\mu_b / \text{D}$              | -0.3                       | -1.8                         | 0.1                          | -1.5                           |
| $\mu_c / \text{D}$              | 0.2                        | -0.2                         | 0.2                          | 0.0                            |

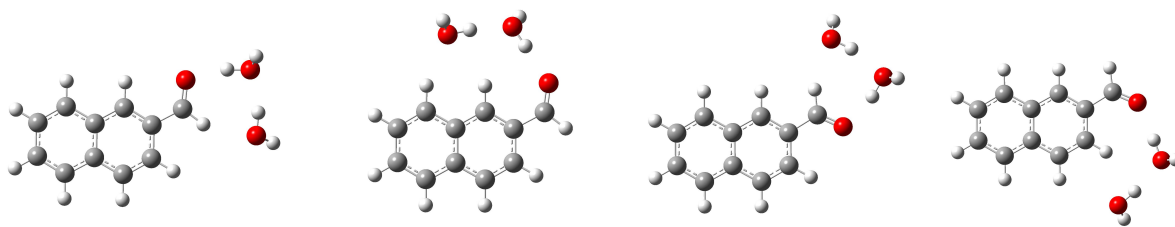

Supplement: d3cp02649c1.pdf [file d3cp02649c1.pdf]
